# Supplementary material
Source: PubMed Central journal article supplement (PMC2821189)
Supplement: NIHMS174277-supplement-supplement_1.pdf [file NIHMS174277-supplement-supplement_1.pdf]

**Supplemental Table S1\_S2**

[Click here to download Electronic Supplementary Material: 2.10.8 NORMAL FLORA supplemental\\_EJCM1.pdf](#)
